# Supplementary material for: ER export via SURF4 uses diverse mechanisms of both client and coat engagement
Source: PubMed Central journal article supplement (PMC11557686; doi:10.1083/jcb.202406103), 2024-11-12

# SourceDataF1

**A**

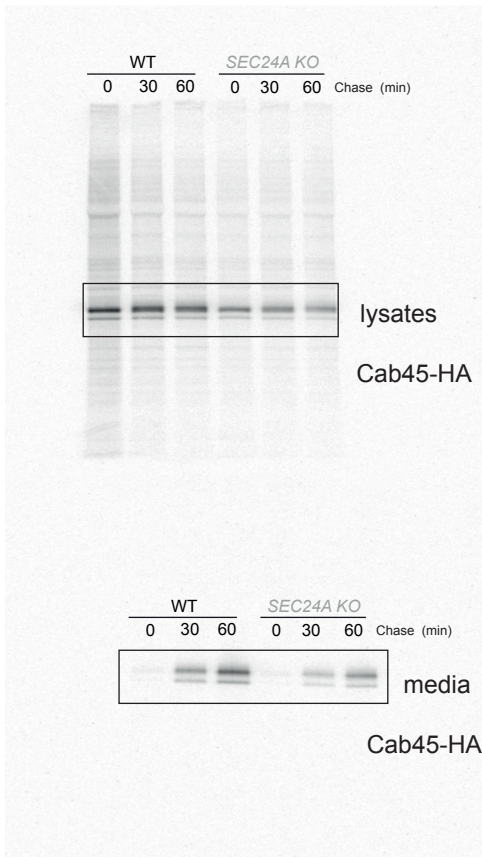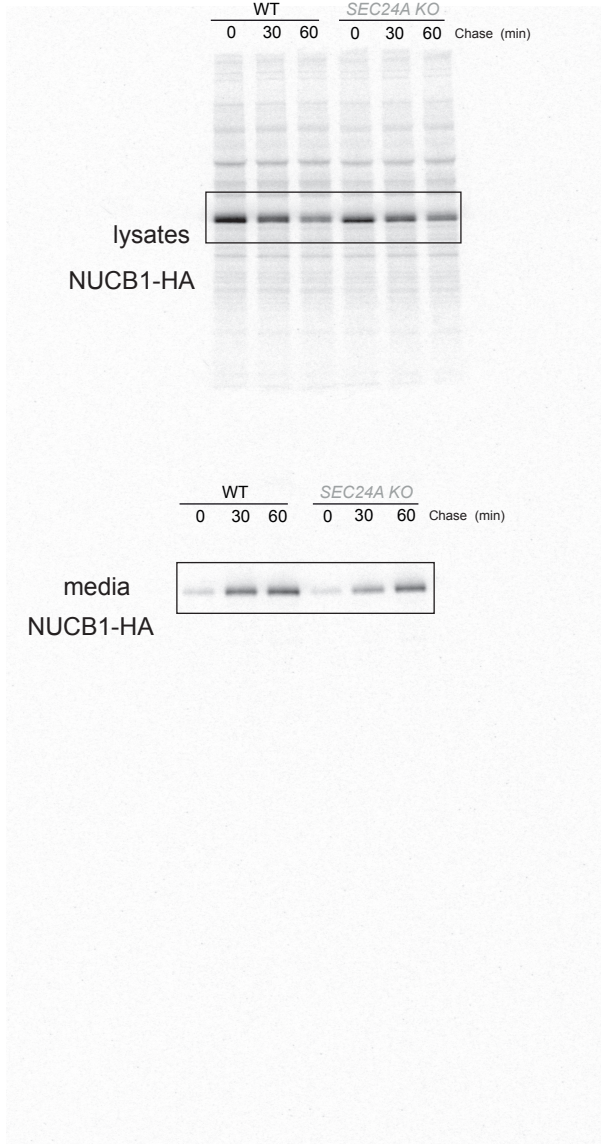

**B**

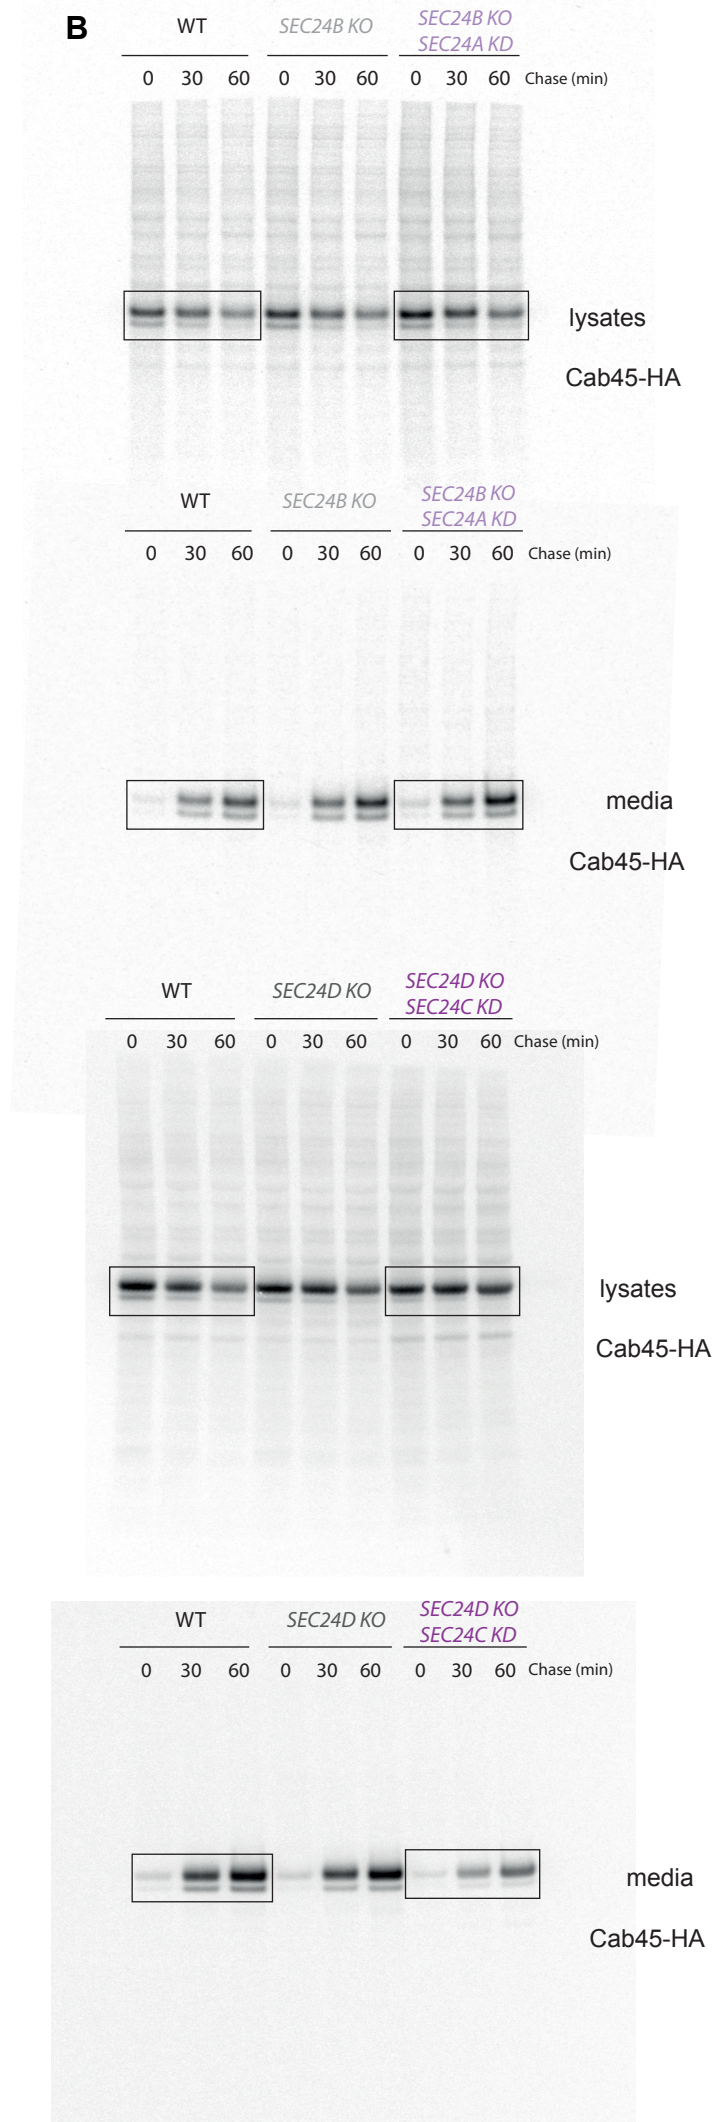

Supplement: JCB_202406103_SourceDataF1.pdf [file JCB_202406103_SourceDataF1.pdf]
