# Supplementary material for: ER export via SURF4 uses diverse mechanisms of both client and coat engagement
Source: PubMed Central journal article supplement (PMC11557686; doi:10.1083/jcb.202406103), 2024-11-12

# SourceDataF3

**A**

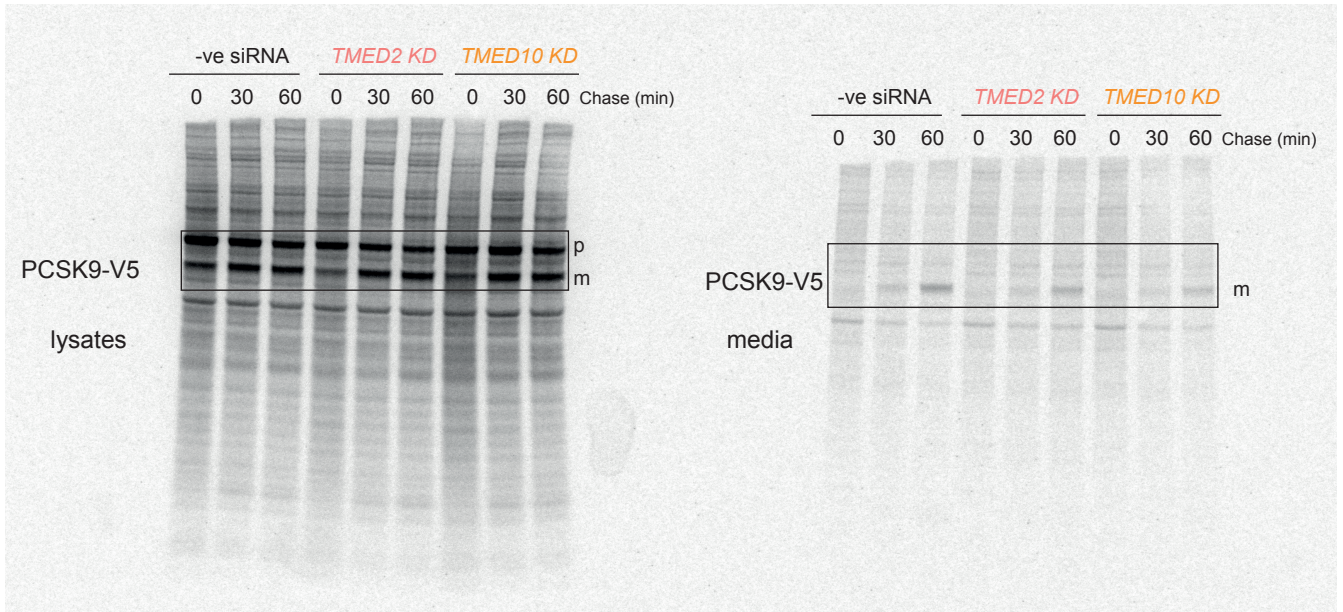

**D**

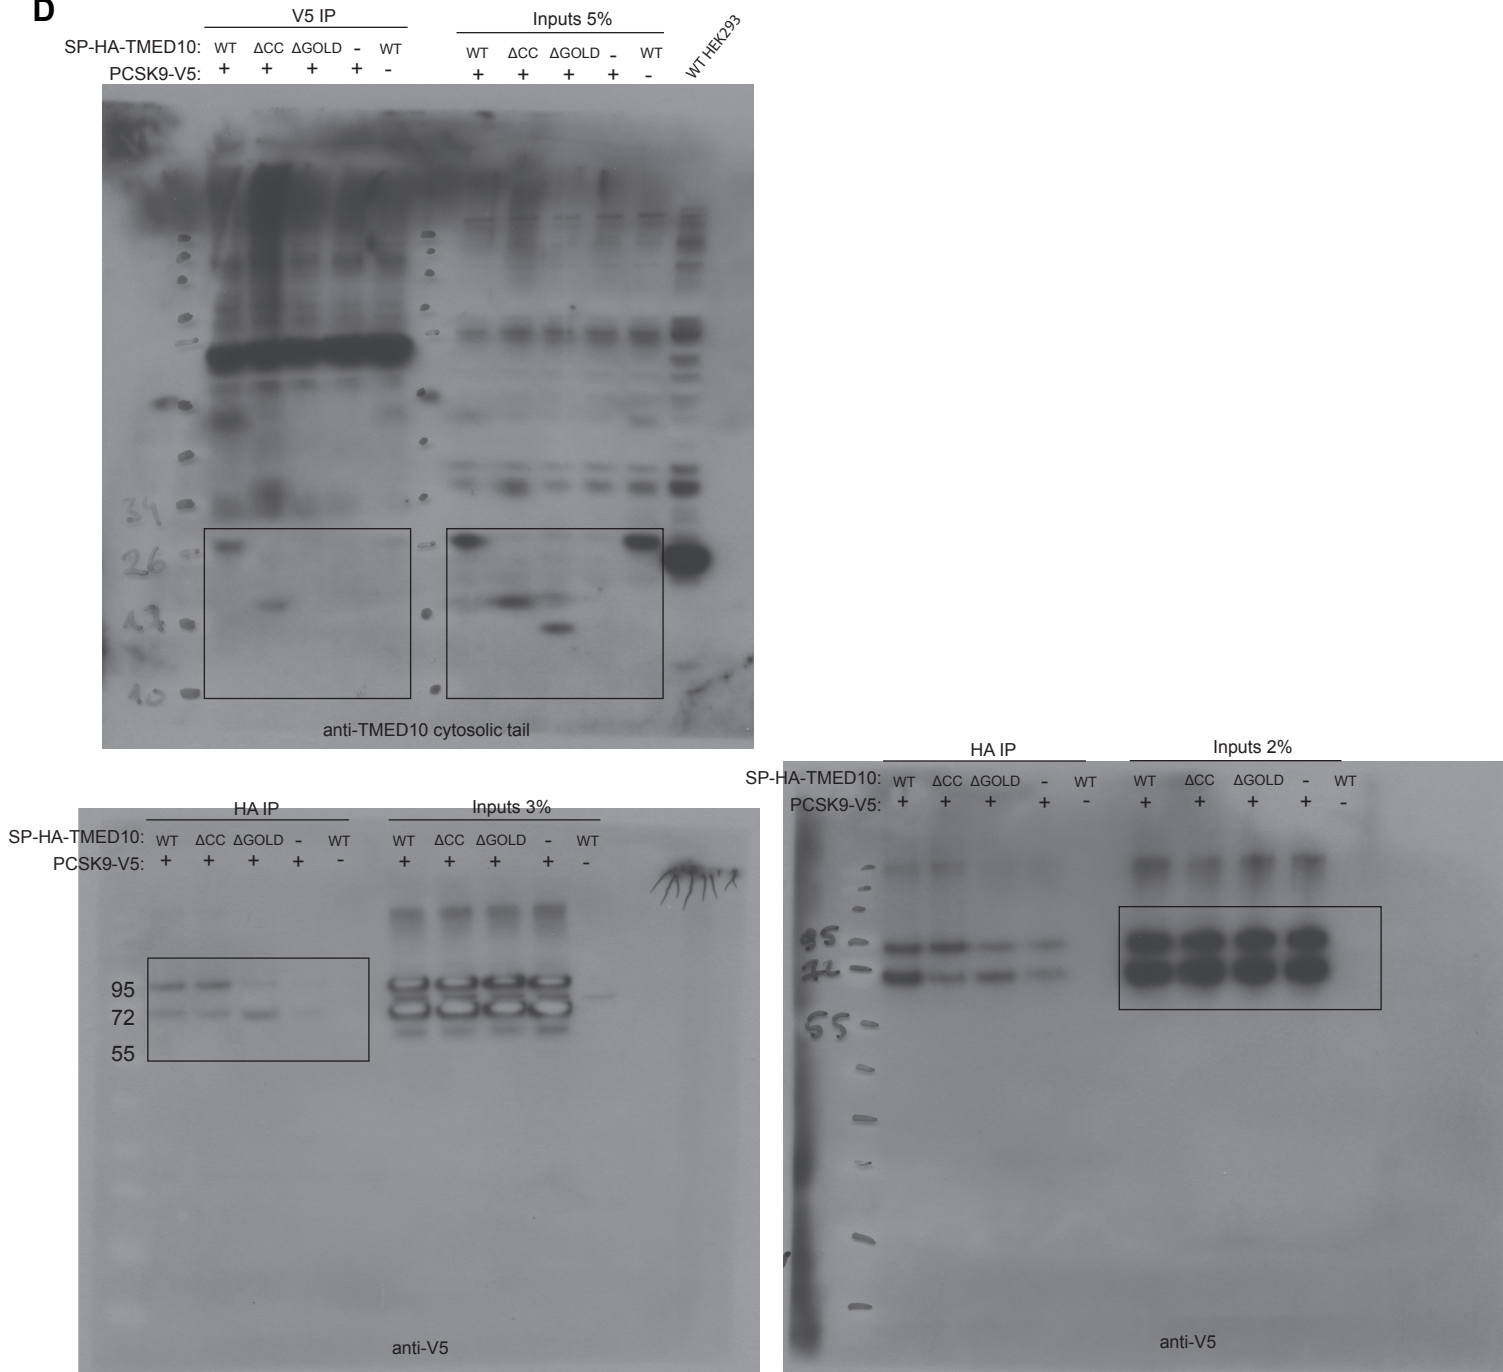

Supplement: JCB_202406103_SourceDataF3.pdf [file JCB_202406103_SourceDataF3.pdf]
