# Supplementary material for: ER export via SURF4 uses diverse mechanisms of both client and coat engagement
Source: PubMed Central journal article supplement (PMC11557686; doi:10.1083/jcb.202406103), 2024-11-12

# SourceDataF4

**B**

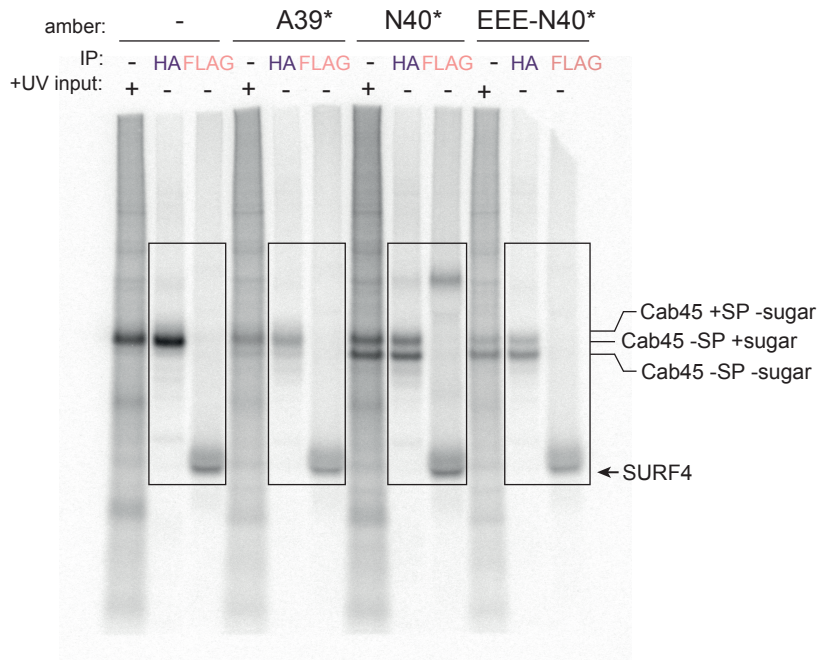

molecular weights in the main figures were obtained by aligning with the stained coomassie gel

**D**

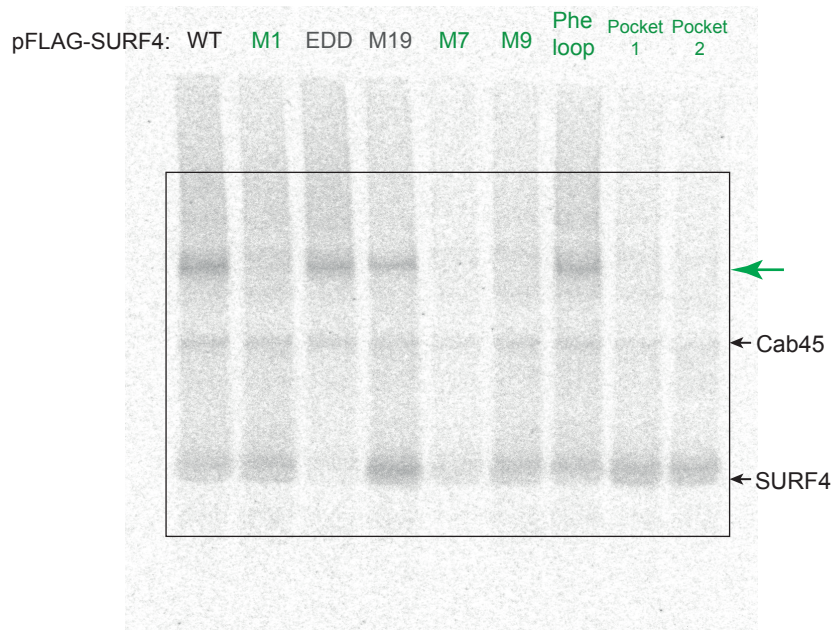

Supplement: JCB_202406103_SourceDataF4.pdf [file JCB_202406103_SourceDataF4.pdf]
