# Supplementary material for: ER export via SURF4 uses diverse mechanisms of both client and coat engagement
Source: PubMed Central journal article supplement (PMC11557686; doi:10.1083/jcb.202406103), 2024-11-12
Supplement: JCB_202406103_SourceDataF5.pdf [file JCB_202406103_SourceDataF5.pdf]

# SourceDataF5

**A**

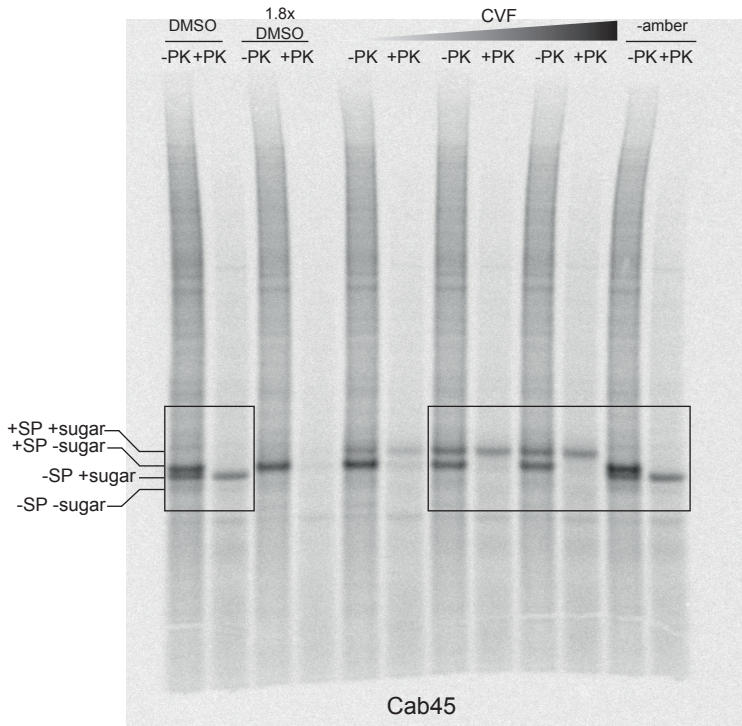

**B**

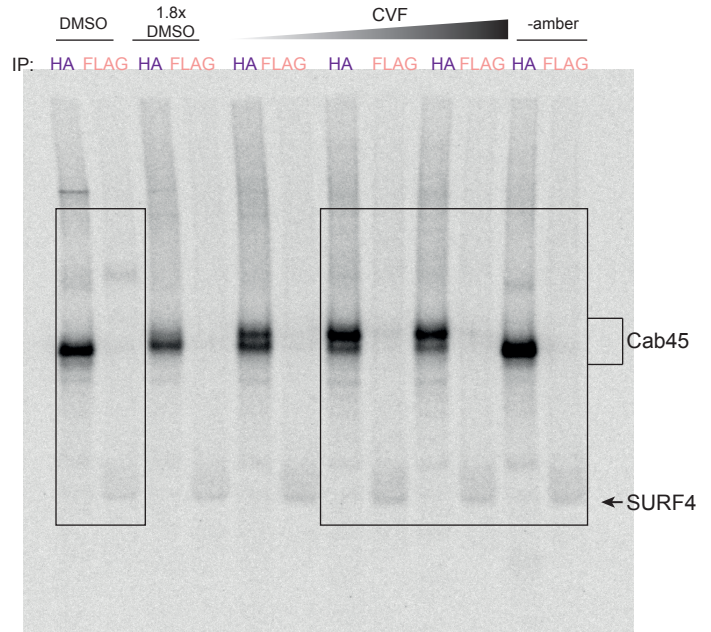

**C**

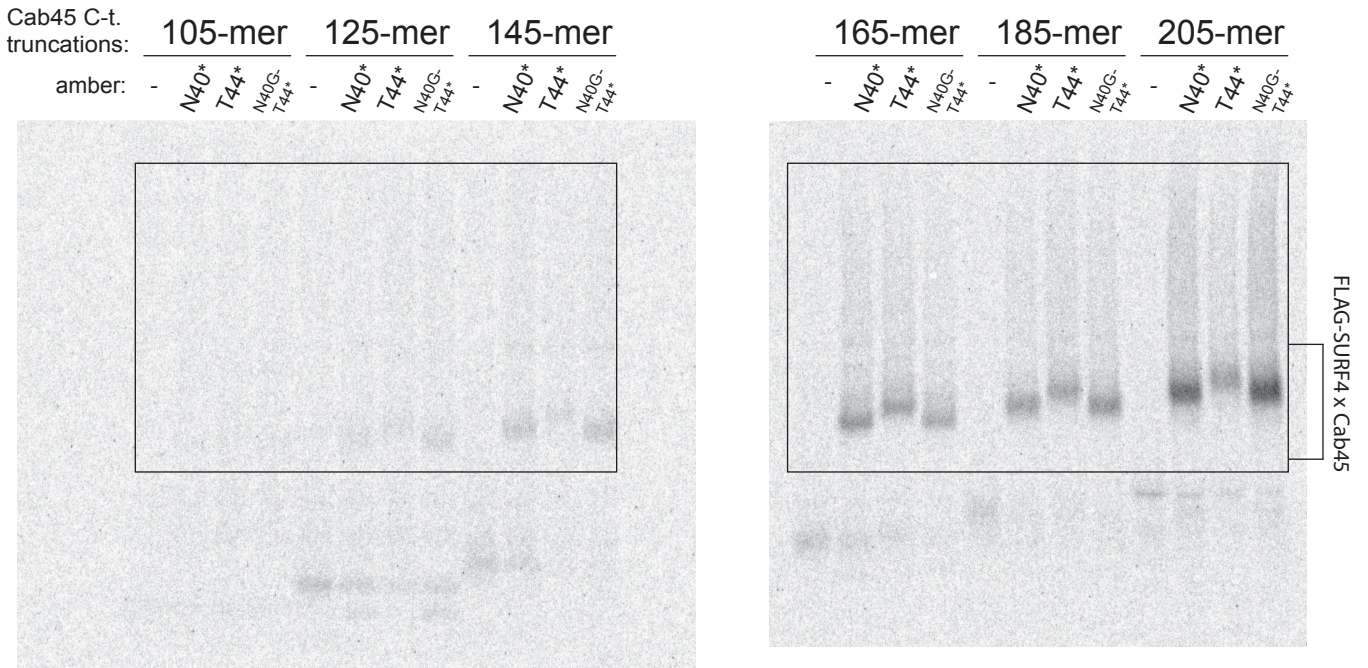

molecular weights in the main figure were obtained by aligning with the stained coomassie gel
