# Supplementary material for: ER export via SURF4 uses diverse mechanisms of both client and coat engagement
Source: PubMed Central journal article supplement (PMC11557686; doi:10.1083/jcb.202406103), 2024-11-12

# SourceDataFS1A

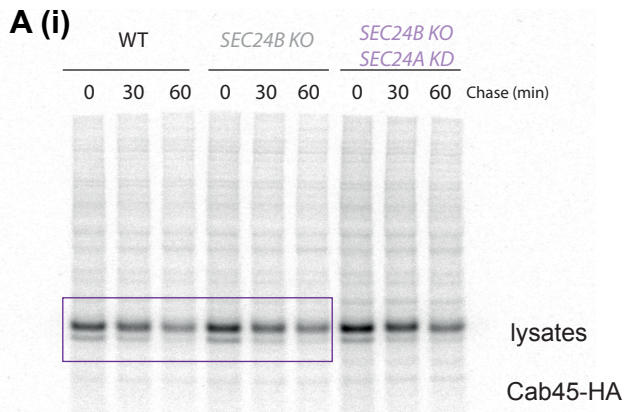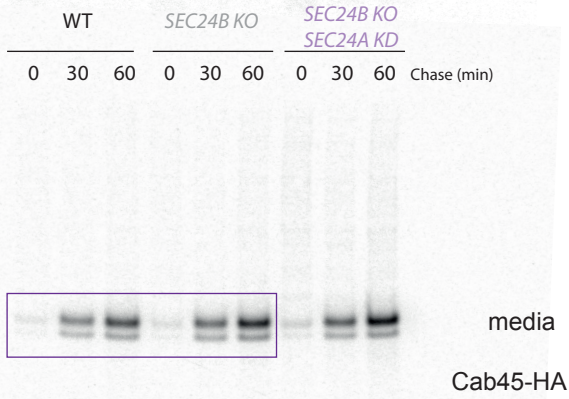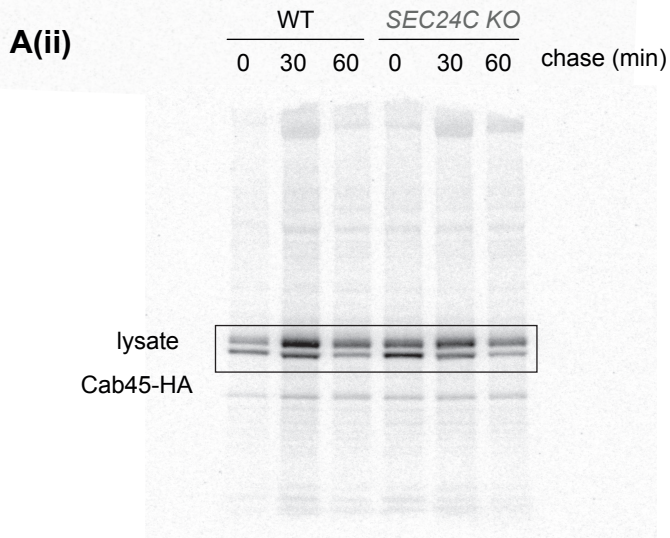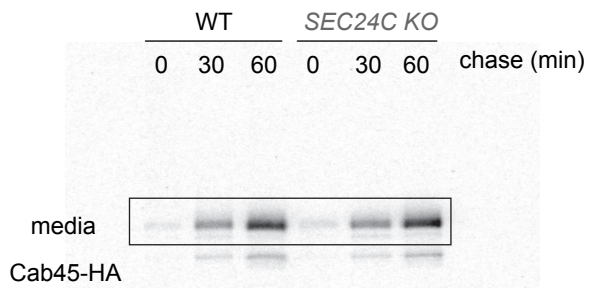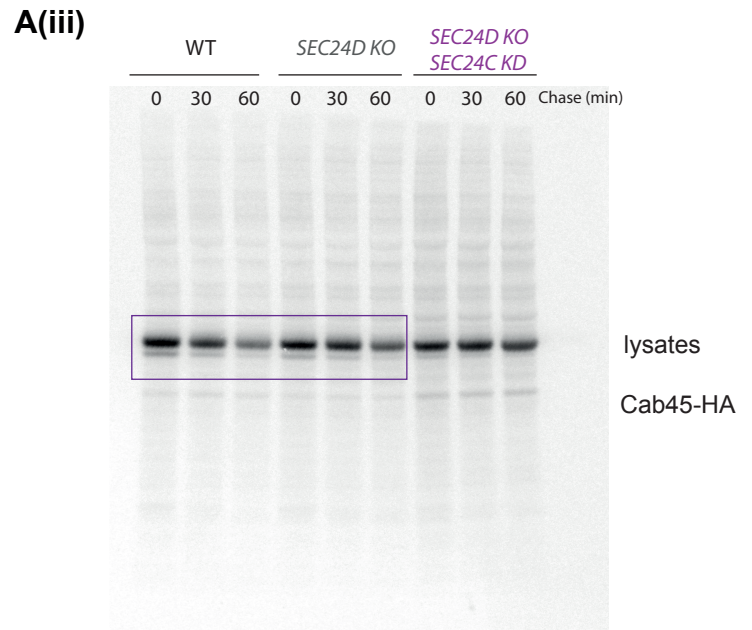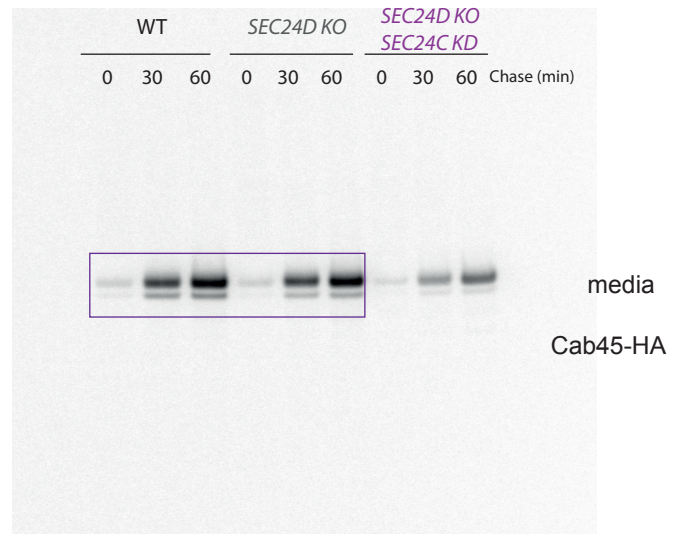

# SourceDataFS1B

**B i)**

SmBiT-SEC24C:

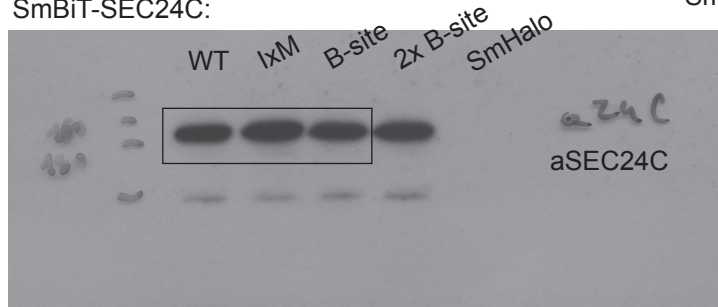

SmBiT-SEC24C: WT 1xM B-site 2x B-site SmHalo

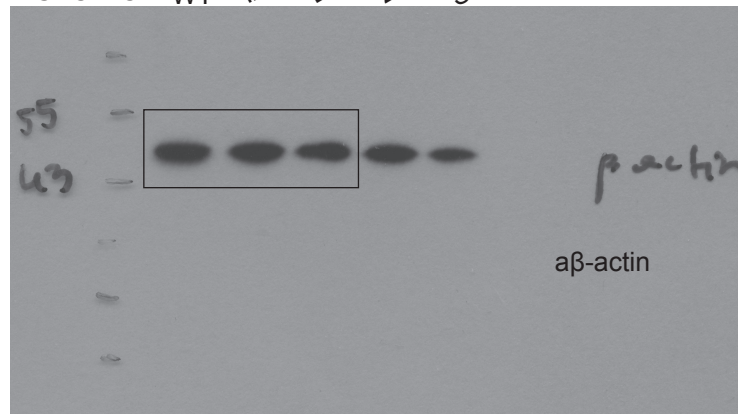

**ii)**

SmBiT-SEC24A:

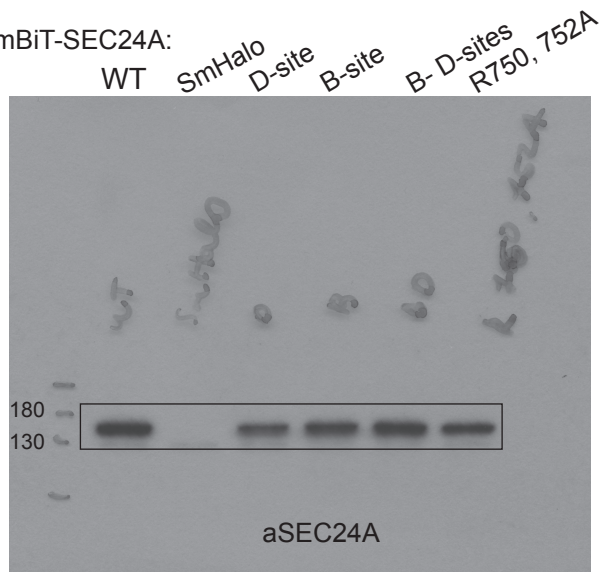

SmBiT-SEC24A: WT SmHalo D-site B-site B-D-sites R750, 752A

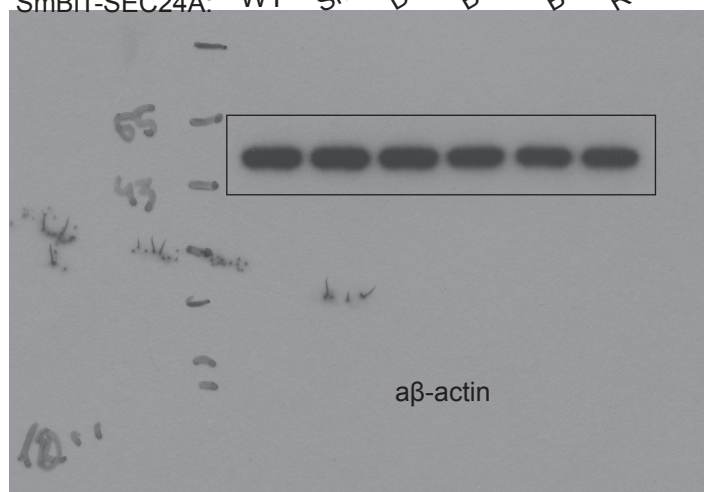

# SourceDataFS1D

## D

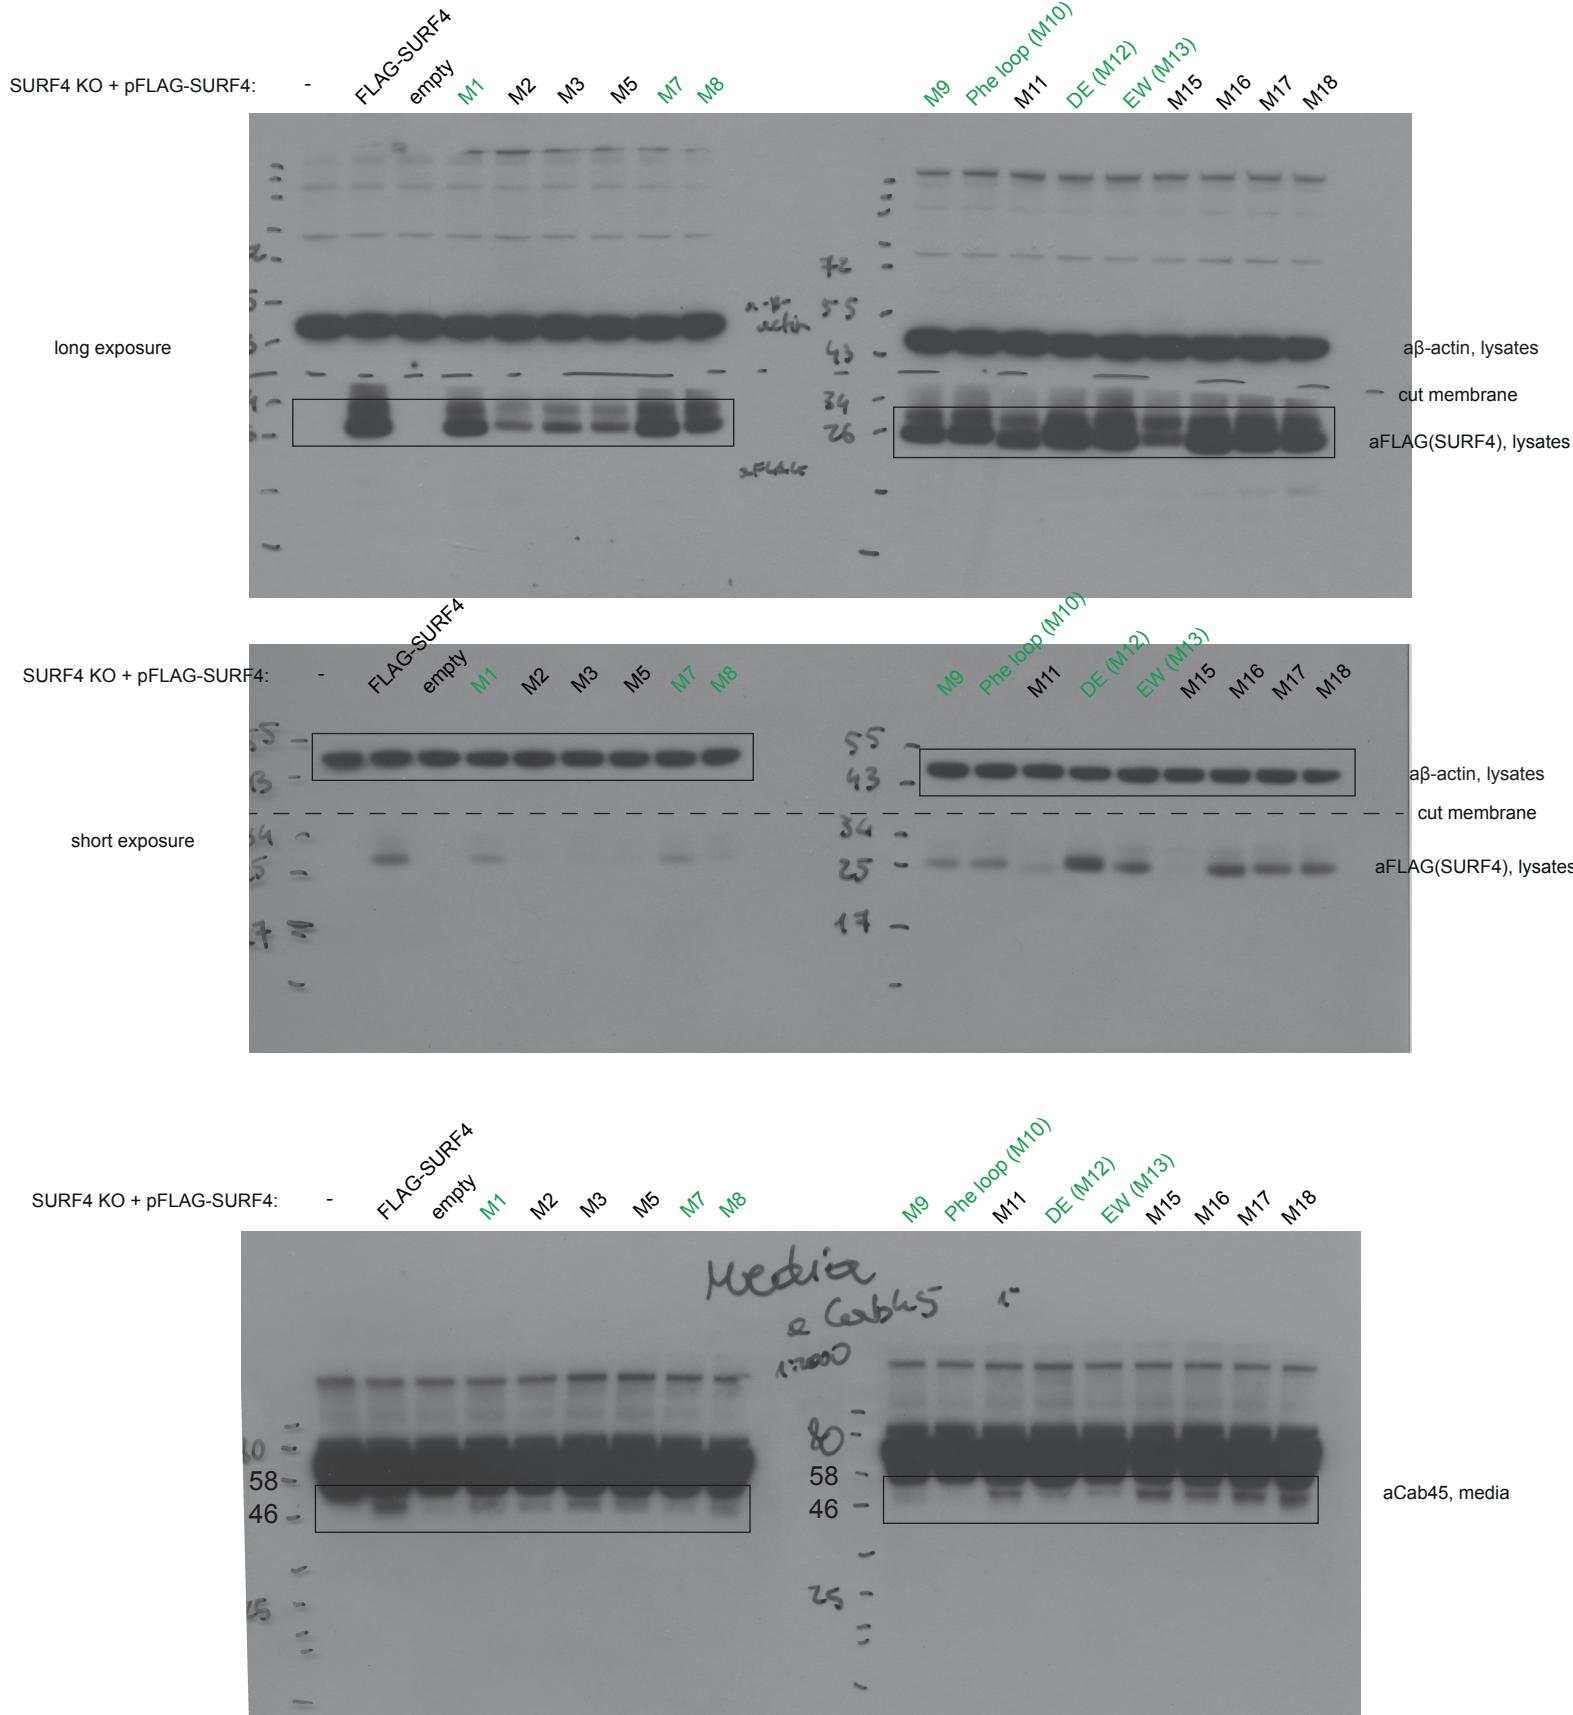

E

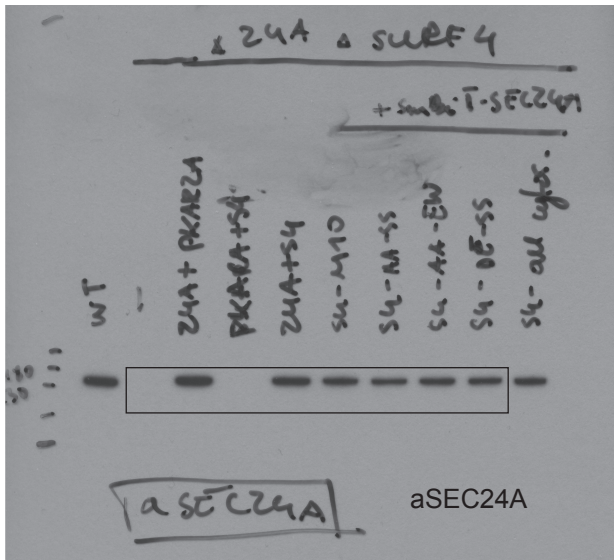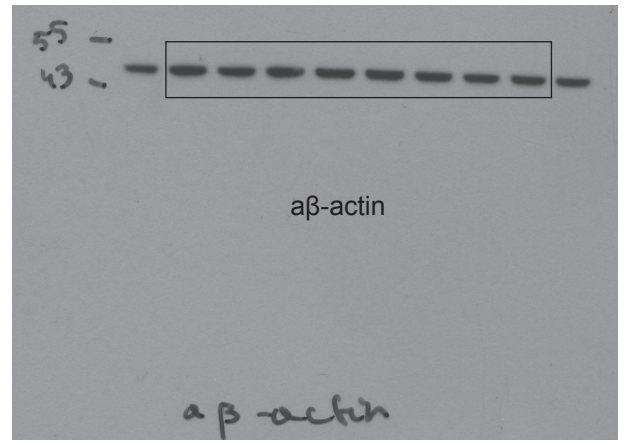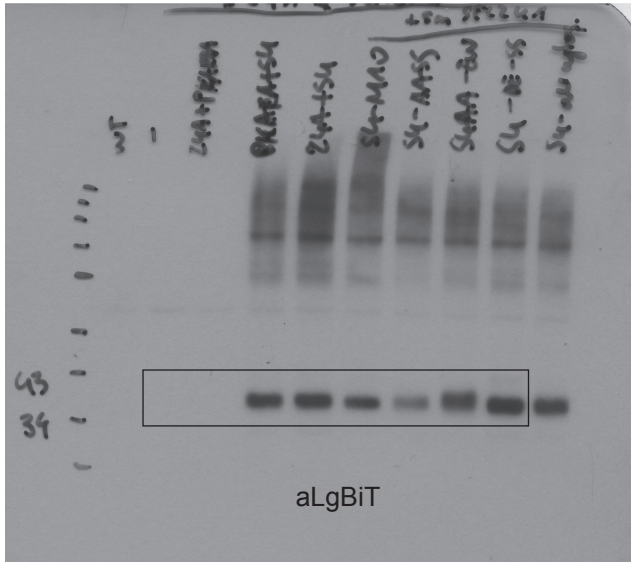

Supplement: JCB_202406103_SourceDataFS1.pdf [file JCB_202406103_SourceDataFS1.pdf]
