# Supplementary material for: ER export via SURF4 uses diverse mechanisms of both client and coat engagement
Source: PubMed Central journal article supplement (PMC11557686; doi:10.1083/jcb.202406103), 2024-11-12

# SourceDataFS3B

## TMED2 KD

## TMED10 KD

Treatment day:      -ve                      s21570                      s21571  
                                          1 2 3                      1 2 3                      1 2 3

                                         -ve                      s21600                      s21601  
                                          1 2 3                      1 2 3                      1 2 3

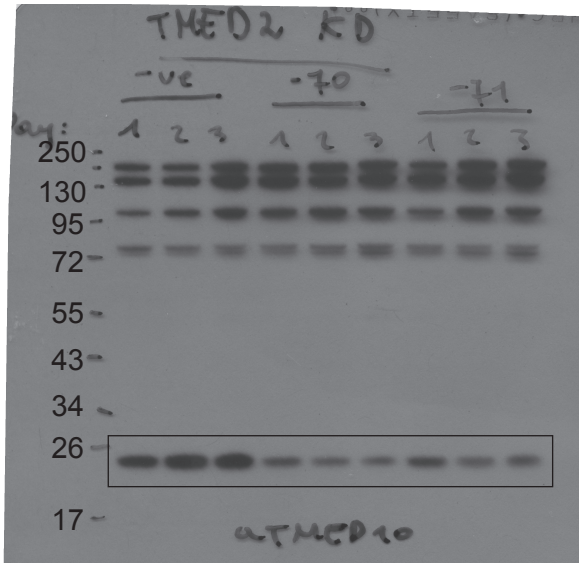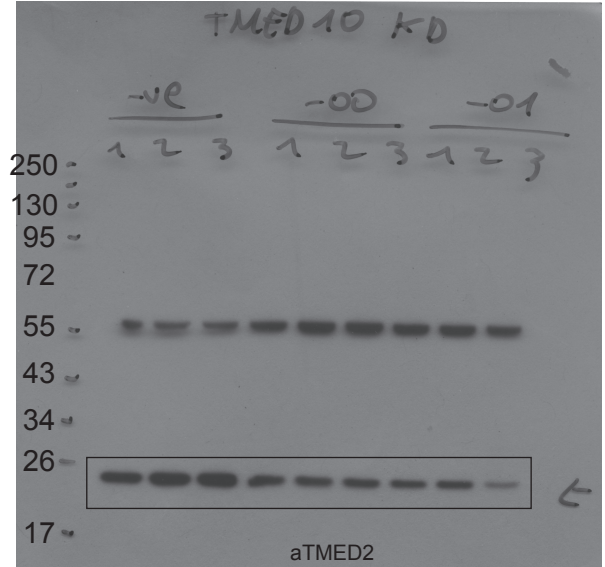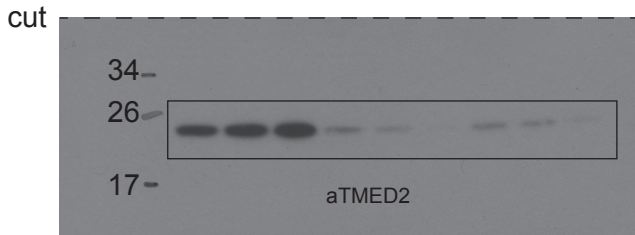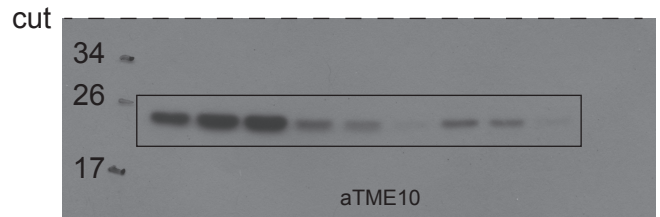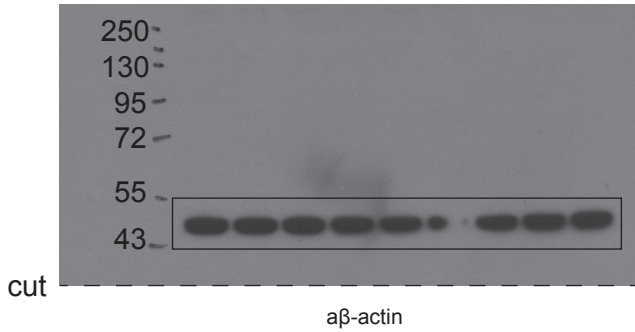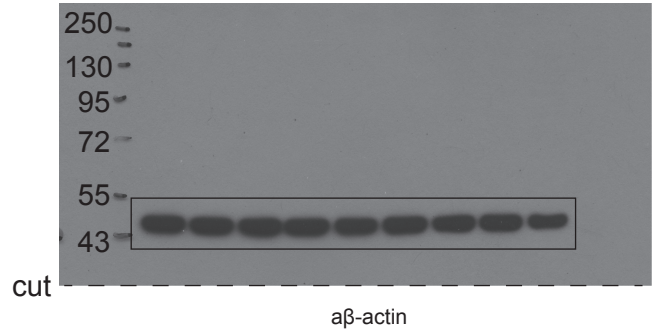

# SourceDataFS3CF

**C**

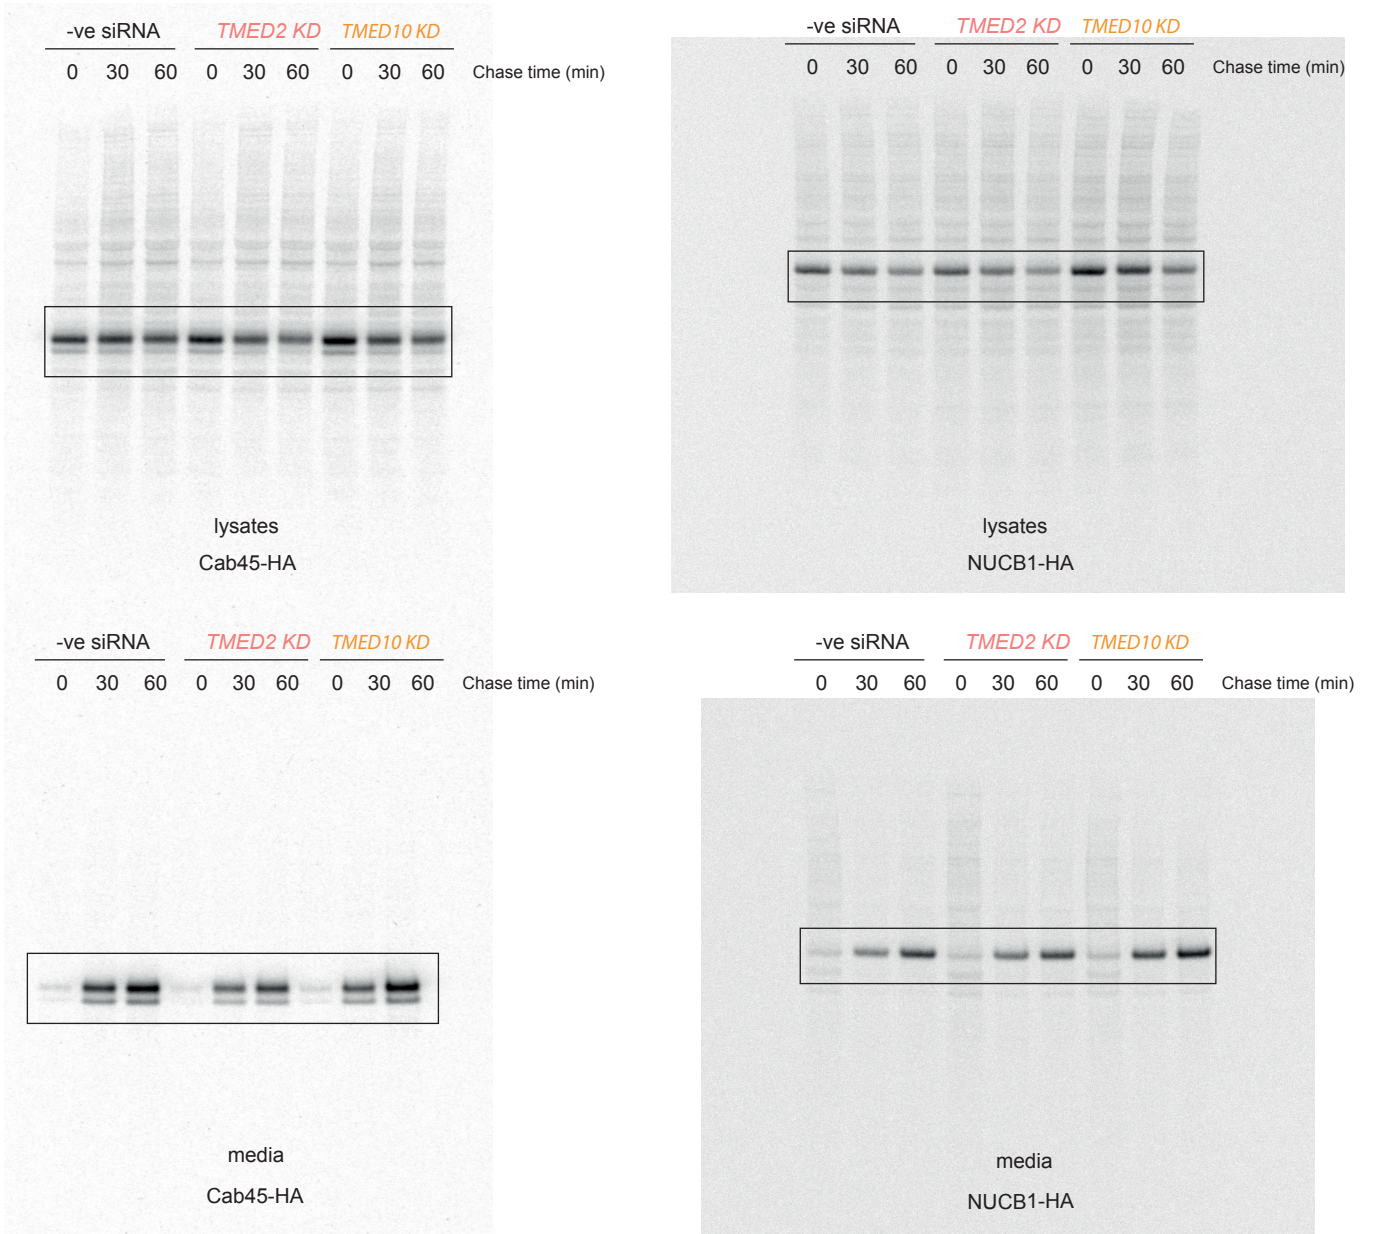

**F**

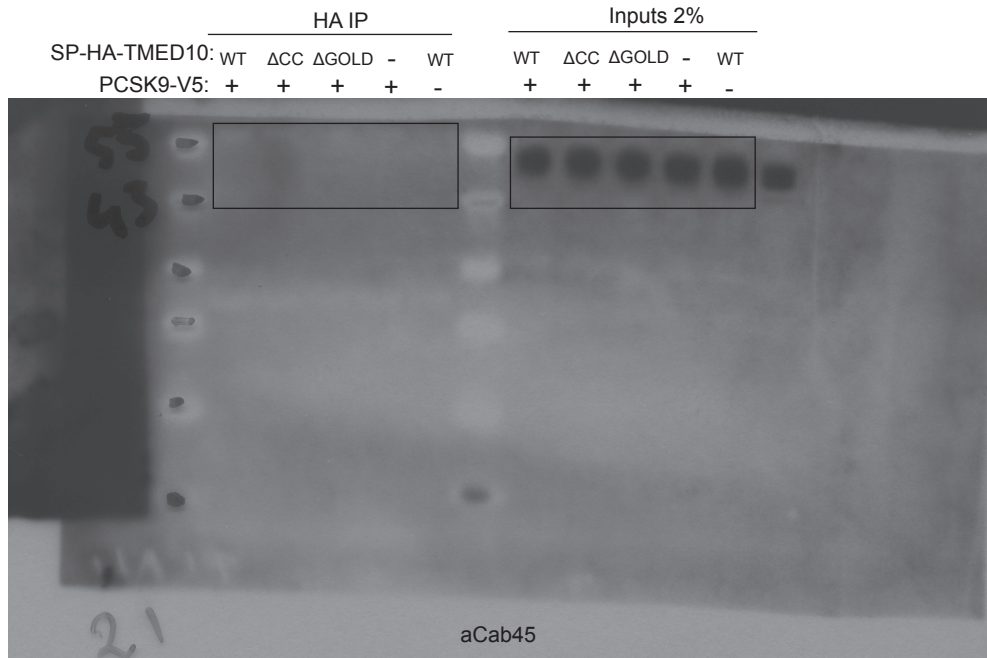

Supplement: JCB_202406103_SourceDataFS3.pdf [file JCB_202406103_SourceDataFS3.pdf]
