# Supplementary material for: ER export via SURF4 uses diverse mechanisms of both client and coat engagement
Source: PubMed Central journal article supplement (PMC11557686; doi:10.1083/jcb.202406103), 2024-11-12
Supplement: JCB_202406103_SourceDataFS4.pdf [file JCB_202406103_SourceDataFS4.pdf]

# SourceDataFS4

**A**

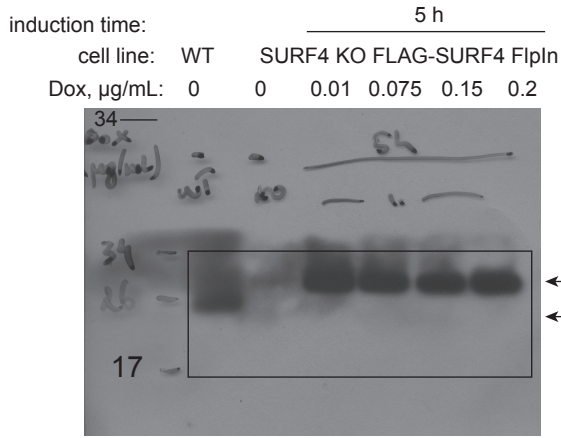

**B**

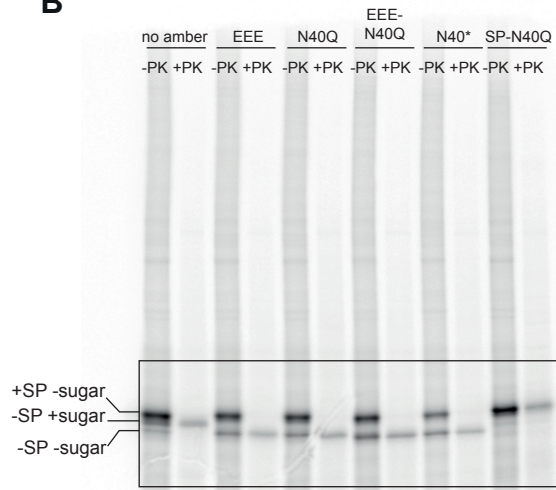

**C**

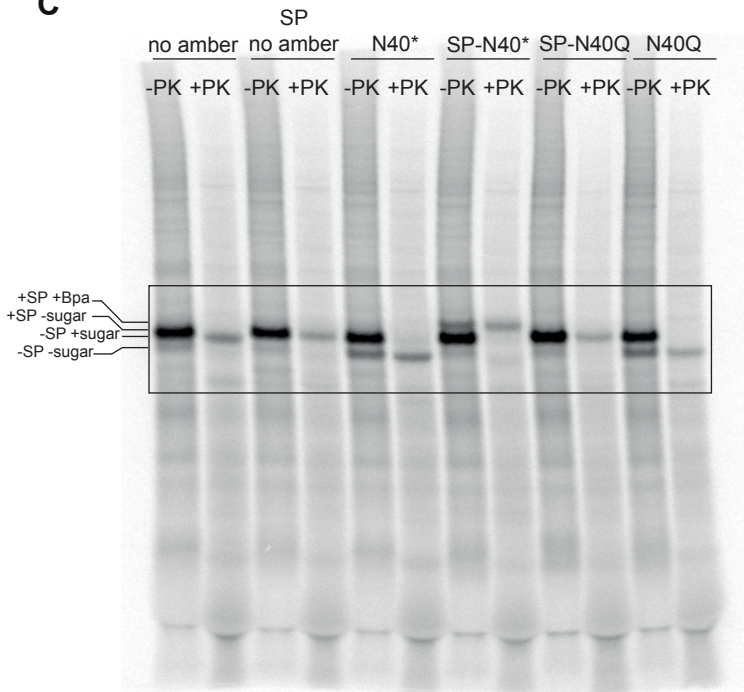

**D**

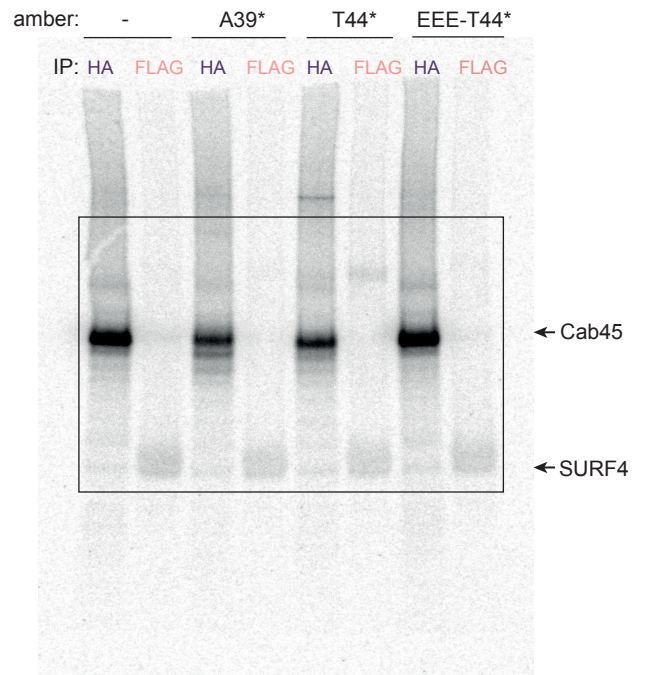

**E**

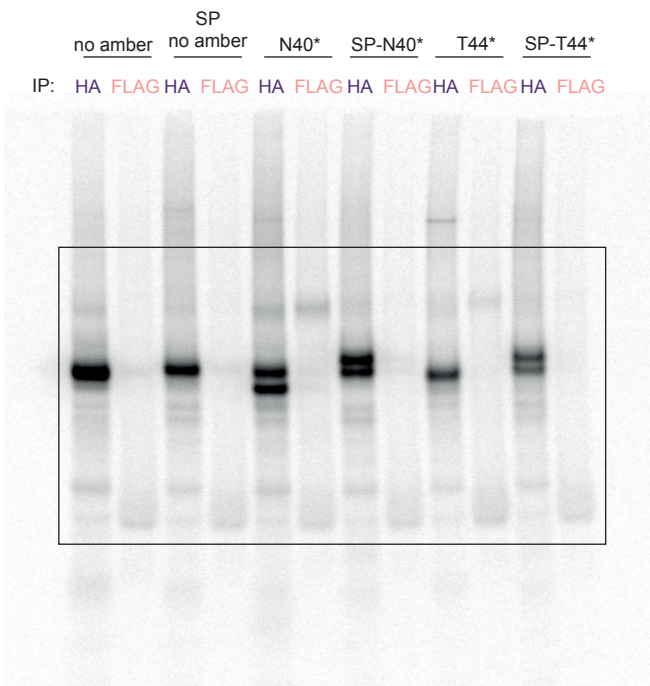

molecular weights in the main figure were obtained by aligning with the stained coomassie gel

# SourceDataFS4

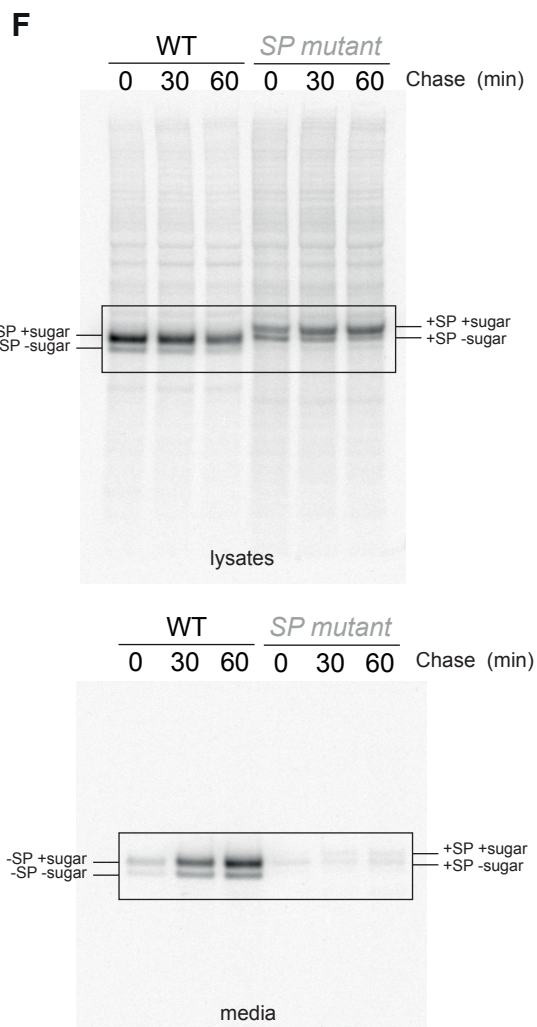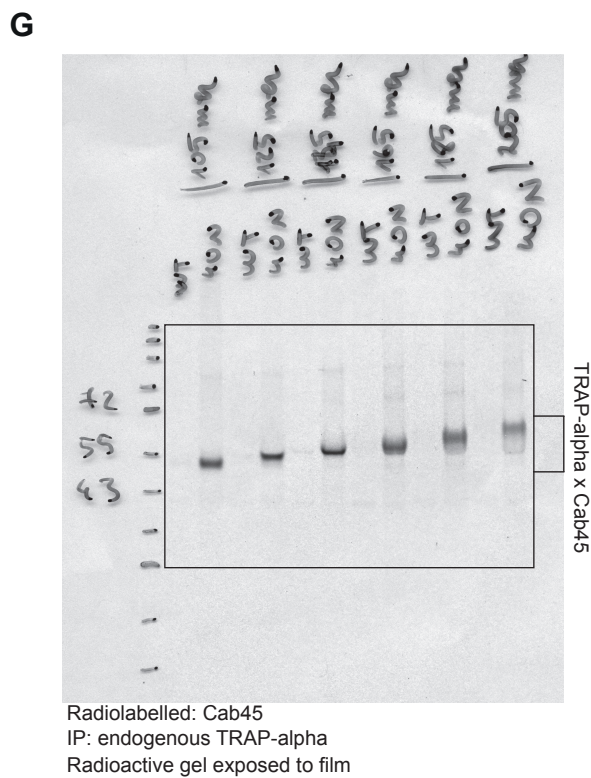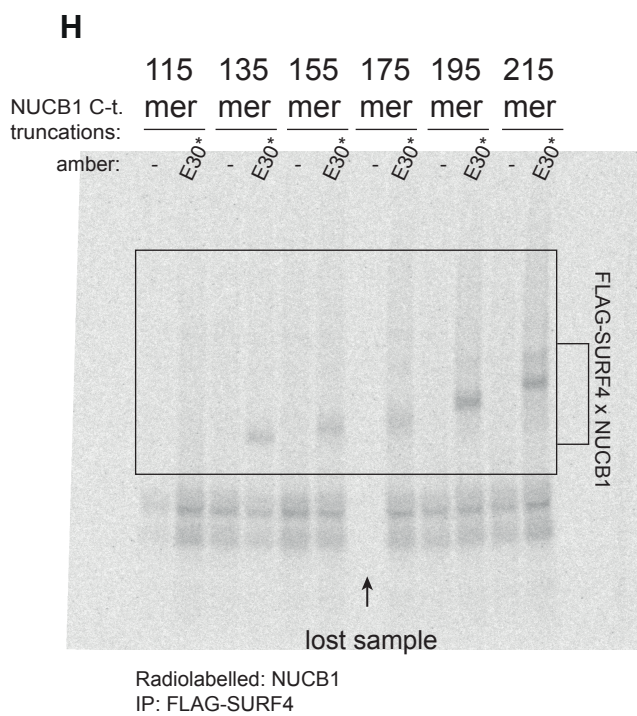

molecular weights in the main figure were obtained by aligning with the stained coomassie gel
